# Supplementary material for: Lipid metabolism in Calanus finmarchicus is sensitive to variations in predation risk and food availability
Source: Sci Rep. 2020 Dec 18;10:22322. doi: 10.1038/s41598-020-79165-6 (PMC7749129; doi:10.1038/s41598-020-79165-6)
Supplement: Supplementary file 2 — Supplementary Table 1. [file 41598_2020_79165_MOESM2_ESM.xlsx]

## Sheet: 1
Supplementary Table 1. Gene expression results of ELOV (elongation of very long chain fatty acids), FABP (a fatty acid binding protein), ferritin, hsp22 and torso-like in C. finmarchicus copepods exposed to a combination of a predator cue and high or low food availability, compared to the reference group (Calanus spp. C5s in diapause). Hi-P=High food and no predator cue; Hi+P=High food and predat…
stage	day	treatment	gene_name	logFC	logCPM	F	p	FDR
C4	2	Hi-P	ELOV	9.47239	7.72771	69.039	<0.001	<0.001
C4	2	Hi+P	ELOV	9.37137	7.72771	67.768	<0.001	<0.001
C4	2	Lo-P	ELOV	10.3246	7.72771	80.2023	<0.001	<0.001
C4	2	Lo+P	ELOV	7.87151	7.72771	48.7072	<0.001	<0.001
C5	10	Hi-P	ELOV	8.84255	7.72771	69.4359	<0.001	<0.001
C5	10	Hi+P	ELOV	8.62903	7.72771	66.6815	<0.001	<0.001
C5	10	Lo-P	ELOV	9.24654	7.72771	74.7529	<0.001	<0.001
C5	10	Lo+P	ELOV	8.76442	7.72771	68.4313	<0.001	<0.001
C5	14	Hi-P	ELOV	6.327	7.72771	37.8051	<0.001	<0.001
C5	14	Hi+P	ELOV	7.41025	7.72771	51.0423	<0.001	<0.001
C5	14	Lo-P	ELOV	8.18291	7.72771	60.89	<0.001	<0.001
C5	14	Lo+P	ELOV	7.34196	7.72771	50.1693	<0.001	<0.001
C6	14	Hi-P	ELOV	7.08344	7.72771	46.9564	<0.001	<0.001
C6	14	Hi+P	ELOV	4.71234	7.72771	20.2266	<0.001	<0.001
C6	14	Lo-P	ELOV	3.27978	7.72771	8.01724	0.00821919	0.017236
C6	14	Lo+P	ELOV	2.84934	7.72771	6.43223	0.0166833	0.0290101
C4	2	Hi-P	FABP	1.84578	8.65126	21.738	<0.001	0.000719179
C4	2	Hi+P	FABP	1.72802	8.65126	18.9447	<0.001	0.00152117
C4	2	Lo-P	FABP	1.89549	8.65126	22.9754	<0.001	0.000601596
C4	2	Lo+P	FABP	1.52407	8.65126	14.546	0.00063947	0.00462445
C5	10	Hi-P	FABP	1.11711	8.65126	13.2168	0.00103473	0.00337618
C5	10	Hi+P	FABP	0.63783	8.65126	4.37888	0.0449991	0.0795391
C5	10	Lo-P	FABP	1.387	8.65126	20.1428	<0.001	<0.001
C5	10	Lo+P	FABP	0.760598	8.65126	6.2039	0.0185442	0.0400211
C5	14	Hi-P	FABP	0.180955	8.65126	0.354527	0.556053	0.62663
C5	14	Hi+P	FABP	-0.151763	8.65126	0.249175	0.621318	0.691515
C5	14	Lo-P	FABP	0.590624	8.65126	3.75738	0.0620905	0.107661
C5	14	Lo+P	FABP	0.130738	8.65126	0.185045	0.670165	0.738275
C6	14	Hi-P	FABP	0.136526	8.65126	0.201842	0.656486	0.727817
C6	14	Hi+P	FABP	-0.428763	8.65126	1.97813	0.169922	0.229322
C6	14	Lo-P	FABP	-0.0109849	8.65126	0.00104531	0.974423	1
C6	14	Lo+P	FABP	-0.236802	8.65126	0.605989	0.442434	0.519362
C4	2	Hi-P	ferritin	-4.96255	7.46336	113.945	<0.001	<0.001
C4	2	Hi+P	ferritin	-4.30133	7.46336	93.2767	<0.001	<0.001
C4	2	Lo-P	ferritin	-4.80332	7.46336	108.696	<0.001	<0.001
C4	2	Lo+P	ferritin	-4.80748	7.46336	109.27	<0.001	<0.001
C5	10	Hi-P	ferritin	-4.04919	7.46336	225.831	<0.001	<0.001
C5	10	Hi+P	ferritin	-4.27535	7.46336	247.154	<0.001	<0.001
C5	10	Lo-P	ferritin	-3.8174	7.46336	205.686	<0.001	<0.001
C5	10	Lo+P	ferritin	-4.01813	7.46336	223.469	<0.001	<0.001
C5	14	Hi-P	ferritin	-3.29702	7.46336	161.203	<0.001	<0.001
C5	14	Hi+P	ferritin	-3.6161	7.46336	188.178	<0.001	<0.001
C5	14	Lo-P	ferritin	-3.16705	7.46336	150.501	<0.001	<0.001
C5	14	Lo+P	ferritin	-3.65944	7.46336	191.935	<0.001	<0.001
C6	14	Hi-P	ferritin	-4.34152	7.46336	252.967	<0.001	<0.001
C6	14	Hi+P	ferritin	-5.0211	7.46336	315.441	<0.001	<0.001
C6	14	Lo-P	ferritin	-4.5293	7.46336	189.54	<0.001	<0.001
C6	14	Lo+P	ferritin	-4.89674	7.46336	304.384	<0.001	<0.001
C4	2	Hi-P	hsp22	-6.78324	6.17761	66.0326	<0.001	<0.001
C4	2	Hi+P	hsp22	-6.07365	6.17761	58.2288	<0.001	<0.001
C4	2	Lo-P	hsp22	-6.76036	6.17761	65.3882	<0.001	<0.001
C4	2	Lo+P	hsp22	-5.95214	6.17761	56.5774	<0.001	<0.001
C5	10	Hi-P	hsp22	-6.37745	6.17761	169.925	<0.001	<0.001
C5	10	Hi+P	hsp22	-6.39593	6.17761	173.173	<0.001	<0.001
C5	10	Lo-P	hsp22	-6.1869	6.17761	164.479	<0.001	<0.001
C5	10	Lo+P	hsp22	-5.99053	6.17761	157.534	<0.001	<0.001
C5	14	Hi-P	hsp22	-6.75945	6.17761	185.514	<0.001	<0.001
C5	14	Hi+P	hsp22	-7.3789	6.17761	205.678	<0.001	<0.001
C5	14	Lo-P	hsp22	-6.62327	6.17761	180.685	<0.001	<0.001
C5	14	Lo+P	hsp22	-6.6365	6.17761	180.628	<0.001	<0.001
C6	14	Hi-P	hsp22	-7.5107	6.17761	210.943	<0.001	<0.001
C6	14	Hi+P	hsp22	-7.12022	6.17761	196.029	<0.001	<0.001
C6	14	Lo-P	hsp22	-7.18848	6.17761	137.219	<0.001	<0.001
C6	14	Lo+P	hsp22	-8.08549	6.17761	228.768	<0.001	<0.001
C4	2	Hi-P	torso-like	-1.37317	7.25249	0.197422	0.660017	0.811477
C4	2	Hi+P	torso-like	-0.935057	7.25249	0.123485	0.727756	0.88205
C4	2	Lo-P	torso-like	-1.73345	7.25249	0.259852	0.613973	0.809658
C4	2	Lo+P	torso-like	5.80825	7.25249	10.7393	0.00266465	0.013965
C5	10	Hi-P	torso-like	5.28518	7.25249	11.1089	0.00230378	0.00666476
C5	10	Hi+P	torso-like	6.79483	7.25249	17.2144	<0.001	0.00103045
C5	10	Lo-P	torso-like	3.32456	7.25249	4.48768	0.0425836	0.0795472
C5	10	Lo+P	torso-like	5.5658	7.25249	12.2151	0.00150457	0.00488606
C5	14	Hi-P	torso-like	7.82037	7.25249	21.5447	<0.001	<0.001
C5	14	Hi+P	torso-like	8.0928	7.25249	22.7097	<0.001	<0.001
C5	14	Lo-P	torso-like	7.23516	7.25249	19.056	<0.001	0.000662513
C5	14	Lo+P	torso-like	7.51123	7.25249	20.2278	<0.001	<0.001
C6	14	Hi-P	torso-like	-1.37236	7.25249	0.436175	0.514043	0.589438
C6	14	Hi+P	torso-like	0.993759	7.25249	0.333789	0.567773	0.645414
C6	14	Lo-P	torso-like	-0.714736	7.25249	0.108417	0.744255	0.817503
C6	14	Lo+P	torso-like	-2.39159	7.25249	1.02279	0.319993	0.393041
